# Supplementary material for: Utilizing a novel unified healthcare model to compare practice patterns between telemedicine and in-person visits
Source: PubMed Central journal article supplement — Digit Health. 2020 Sep 17;6:2055207620958528. doi: 10.1177/2055207620958528 (PMC7503002; doi:10.1177/2055207620958528), 2020-09-17
Supplement: sj-pdf-1-dhj-10.1177_2055207620958528.pdf [file sj-pdf-1-dhj-10.1177_2055207620958528.pdf]

Supplement 1: Health Risk Assessment

**STANFORD PRIMARY CARE: MEDICAL RISK SCREENING**

1. What is your age? (if >65 or on Medicare, go to Senior Care Triage Algorithm)

2. In general, how would you rate your current health? (alternative language....?)

“Excellent” = 0 points, “very good” = 1 pt, “good” = 2 pts, “fair” =4pts or “poor” =6pts

3. Approximately how many different prescription medications do you take regularly for ongoing conditions, not counting vitamins and over the counter medicines.

“0 meds”=0 points, “1-2 meds”=1 pts, “3-5meds ” = 2 pts, “5-7 meds” = 3 pts, or “>8 meds” = 6 points

4. Approximately how many specialists have you seen in the past year, not including for minor skin, eye, or orthopedic injuries, or routine gynecologist exams?

“0” = 0 points, “1-2” = 1pt, “3-4”=2 pts, or “>5”= 4 pts

5. Have you been hospitalized for any illness in the past year other than minor planned surgery?

No=0; Yes =4

1. Please rank which method of communication you prefer to use with your care team, e.g., doctor, nurse practitioner, etc?

|                  |          |           |                 |                    |           |
|------------------|----------|-----------|-----------------|--------------------|-----------|
| <b>Email</b>     | 1) Never | 2) Rarely | 3) Occasionally | 4) Very Frequently | 5) Always |
| <b>Phone</b>     | 1) Never | 2) Rarely | 3) Occasionally | 4) Very Frequently | 5) Always |
| <b>Video</b>     | 1) Never | 2) Rarely | 3) Occasionally | 4) Very Frequently | 5) Always |
| <b>In-person</b> | 1) Never | 2) Rarely | 3) Occasionally | 4) Very Frequently | 5) Always |

CAT I: VERY LOW RISK IF TOTAL POINTS = 0-4 THEN SUGGEST VIRTUAL PCP

CAT II: ROUTINE RISK IF TOTAL POINTS = 5-11 THEN SUGGEST ROUTINE PRIMARY CARE

CAT III: HIGH RISK IF TOTAL POINTS >=12 THEN SUGGEST STANFORD COORDINATED CARE
